# Supplementary material
Source: PubMed Central journal article supplement (PMC8514115)

**Figure S1**

**A**

**The effect of PrKD1 on cell cycle after DNA damage (gamma radiation)**

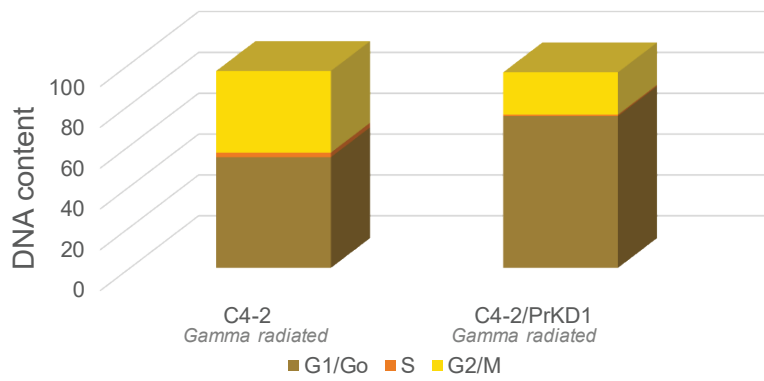

**B**

**sensitivity of cell cycle phases to Gamma radiation in the presence of PrKD1**

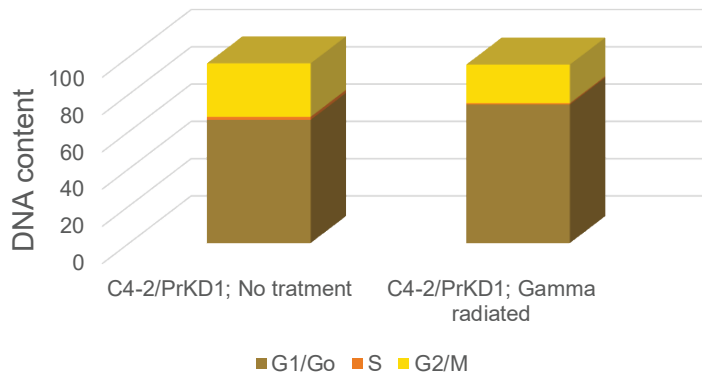

Supplement: NIHMS1632774-supplement-Supplement_Figure_S1.pdf [file NIHMS1632774-supplement-Supplement_Figure_S1.pdf]
