# Supplementary material
Source: PubMed Central journal article supplement (PMC8514115)

Figure S2

A

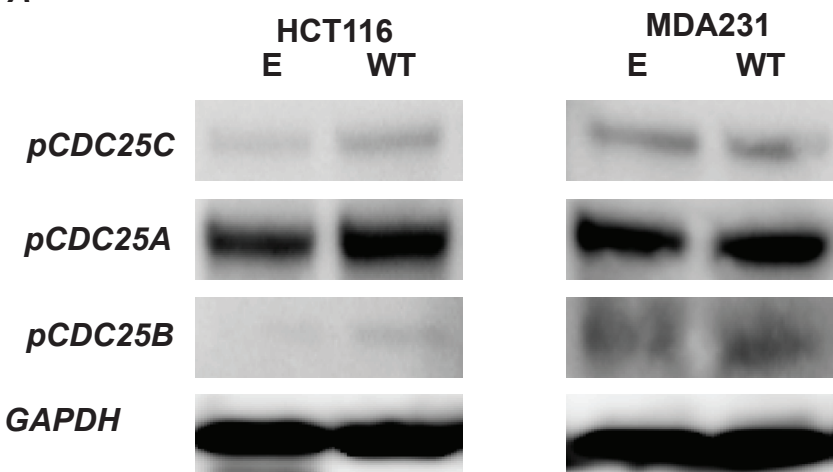

B

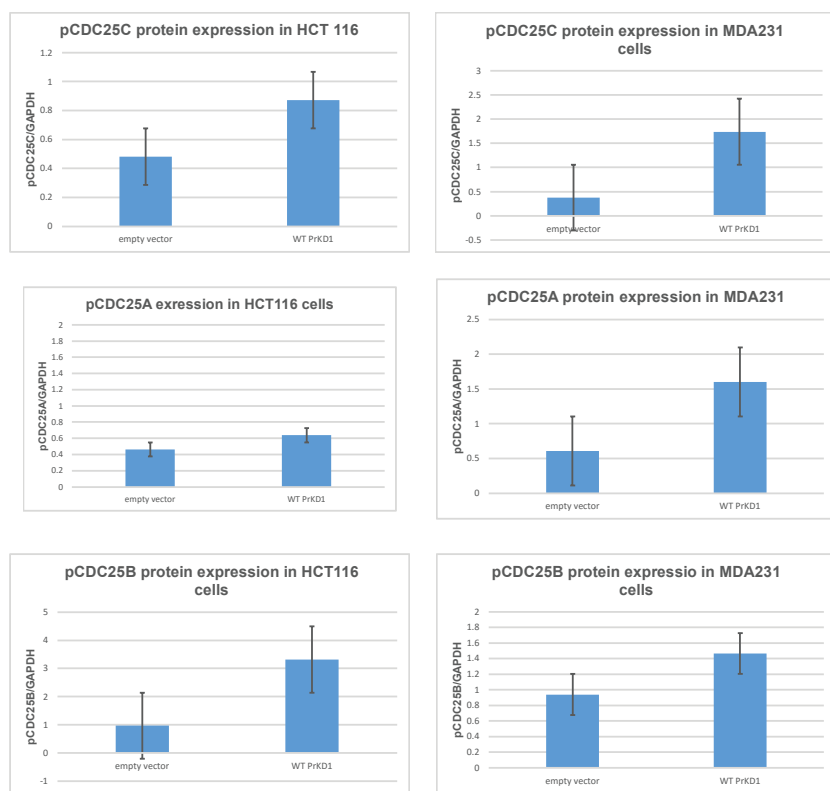

Supplement: NIHMS1632774-supplement-Supplement_figure_S2.pdf [file NIHMS1632774-supplement-Supplement_figure_S2.pdf]
